# Supplementary material
Source: Springer Nature journal article supplement (https://www.springermedizin.de/resource/supplementary/13024_2011_329_MOESM9_ESM.pdf/9643764)

### MoRK13

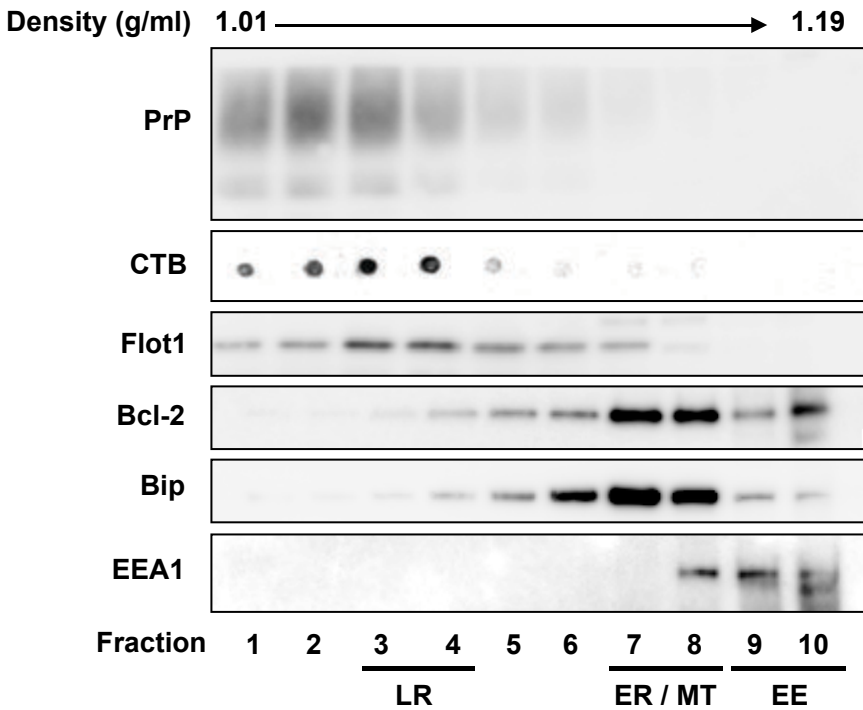

### MoRK13-inf

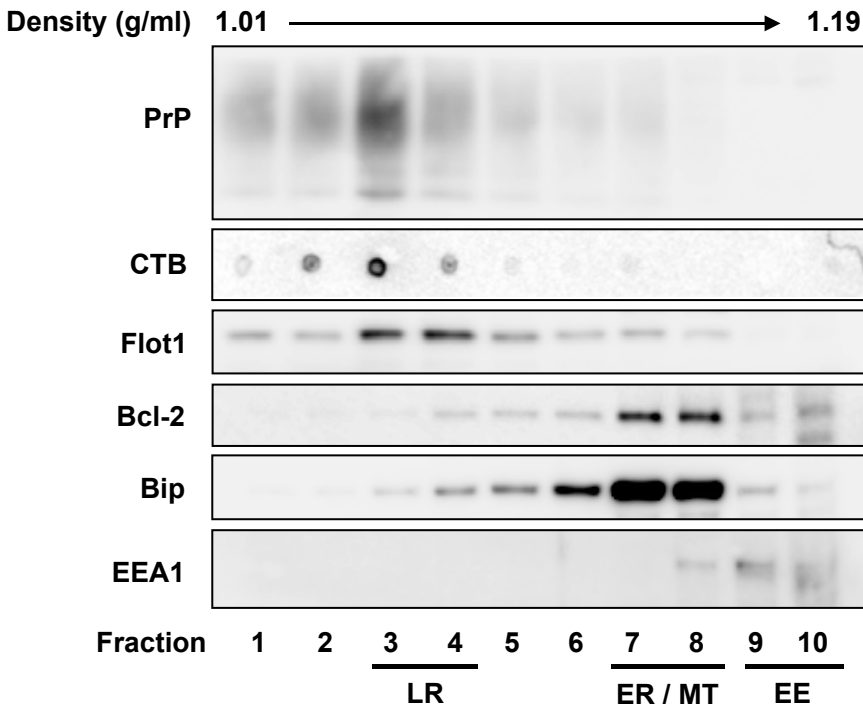

Supplement: MOESM9 [file 9643764]
